## Influence of high altitude on the expression of HIF-1 and on the prognosis of Ecuadorian patients with gastric adenocarcinoma

Edwin Cevallos Barrera<sup>1,2</sup>, Edson Zangiacomi Martinez<sup>3</sup>, Mariangela Ottoboni Brunaldi<sup>4</sup>, Eduardo Antonio Donadi<sup>5</sup>, Ajith Kumar Sankarankutty<sup>2</sup>, Rafael Kemp<sup>2</sup> and José Sebastiao dos Santos<sup>2</sup>

<sup>1</sup>Universidad Central del Ecuador, Ciencias Médicas, Carrera de Medicina, Hospital de Especialidades de Fuerzas Armadas HE-1, Quito, Ecuador

<sup>2</sup>Department of Surgery and Anatomy, Ribeirao Preto Medical School, University of São Paulo, São Paulo, Brazil

<sup>3</sup>Department of Social Medicine, Ribeirao Preto Medical School, University of São Paulo, São Paulo, Brazil

<sup>4</sup>Department of Pathology, Ribeirao Preto Medical School, University of São Paulo, São Paulo, Brazil

<sup>5</sup>Department of Internal Medicine, Ribeirao Preto Medical School, University of São Paulo, São Paulo, Brazil

**Correspondence to:** José Sebastiao dos Santos, **email:** lab.biomol.cirurgia@fmrp.usp.br

**Keywords:** gastric adenocarcinoma; hypoxia-induced factor; HER2; survival rate; tumor markers

**Received:** June 09, 2022

**Accepted:** August 29, 2022

**Published:** September 14, 2022

**Copyright:** © 2022 Barrera et al. This is an open access article distributed under the terms of the [Creative Commons Attribution License](https://creativecommons.org/licenses/by/3.0/) (CC BY 3.0), which permits unrestricted use, distribution, and reproduction in any medium, provided the original author and source are credited.

### ABSTRACT

Since the incidence of gastric adenocarcinoma (GA) is high in populations living at high altitudes, we evaluated the influence of altitude on the expression of HIF-1 and survival of Ecuadorian GA patients. **Method:** 155 GA cases were studied: 56 from coastal (GAC) and 99 from mountainous regions (GAM), and 74 non-GA controls (25 coast and 49 mountain). The expression of HIF-1/HER2 was analyzed by immunohistochemistry. Analyses were performed using Fisher's exact and Breslow-Day tests for homogeneity and Kaplan-Meier curves and restricted median survival time  $\Delta$ RMST. **Results:** HIF-1 was overexpressed in normal/inflamed gastric mucosa, especially in mountainous non-GA patients ( $p = 0.001$ ). There was no difference between GAC and GAM in terms of age/gender, HIF-1/HER2 expression, stage/tumor location. Median survival at 120 months was significantly higher among GAC, with a difference ( $\Delta$ RMST) of 43.7 months (95% CI 29.5, 57.8) ( $p < 0.001$ ) and those with positive HIF-1 expression:  $\Delta$ RMST 26.6 months (95% CI 11.0, 42.1) ( $p < 0.001$ ). Positive HIF-1 expression was associated with better GAM survival, with  $\Delta$ RMST 33.6 months (95% CI 14.2, 52.9) ( $p < 0.001$ ). **Conclusion:** Despite the limitations of this retrospective study, GA patients in the coastal region and those who expressed HIF-1 exhibited a better prognosis, but this factor was associated with better survival only in the mountain region.

### INTRODUCTION

Cancer incidence and mortality are growing rapidly around the world, becoming a major barrier to increasing life expectancy [1]. Gastric cancer is the third leading cause of death in the world and is estimated to cause almost 15 million deaths by 2035 [2]. Gastric adenocarcinoma (GA) has a high incidence in Ecuador, in men it ranks third and in women it ranks fifth.

Ecuador has a varied altitude diversity and there is a differential incidence of cancer between populations living

in the Andean or mountainous region when compared to coastal populations or living at low altitude. In Quito and Ambato, cities located at 2800 meters above sea level, GA also has a very high incidence: 19.6 in men and 13.9 in women per 100,000 inhabitants. There is also a high mortality rate: 16.3 in men and 11.0 in women per 100,000 inhabitants [3, 4]. In Guayaquil, located 100 meters above sea level, the incidence rate of GA is 7.5 in men and 5.2 in women per 100,000 inhabitants, while mortality is 6.20 deaths in 2009; 5.91 deaths in 2013, and 6.32 in 2018 per 100,000 inhabitants [5].

Several factors may act as promoters of gastric cancer including dietary, environmental, and demographic factors; however, there is a broad description of the genetic and molecular factors associated with carcinogenesis and response to the treatment. The TOGA study showed that HER2+ patients, who received chemotherapy plus Trastuzumab, had higher response rates and longer overall survival. It is likely that other receptors, such as HER3 and HER4, also have a similar potential response to other monoclonal antibodies [6].

The association between geographic altitude, regulation of gene expression sensitive to changes in oxygen levels, tissue hypoxia factors and cancer has been the subject of multiple studies [7]. The expression of hypoxia-inducing factors (HIF), deficiency of vitamin D, increased ultraviolet radiation, oxygen toxicity and physiological changes in pH have been implicated on altitude-induced life damage. [8, 9] Cells subjected to hypoxia could favor the expression of HIF genes responsible for cell proliferation, angiogenesis, metastasis, and even increased metabolism [10].

In gastric cancer patients, HIF-1 activation after hypoxia strongly correlates with an aggressive tumor phenotype and poor prognosis. HIF-1 activation has also been reported to occur through mechanisms independent of hypoxia, such as PI3K/AKT/mTOR signaling and ROS production. Critical roles of HIF-1 are found in glucose metabolism, carcinogenesis, angiogenesis, invasion, metastasis, cell survival, and chemo resistance of gastric cancer [8, 11, 12]. Previous studies have also reported that HIF-1 is involved in resistance to anti-cancer chemotherapy drugs [13].

Considering that: I) altitude may influence the expression of HIF-1 in GA patients, II) GA is very frequent in Ecuador particularly in areas of high altitudes (Quito and Ambato, both situated 2800 meters above sea level) when compared to low-altitude areas (Guayaquil, situated 100 meters above sea level), we evaluated HIF-1 expression and its impact on patient survival in these distinct Ecuadorian areas.

## RESULTS

We analysed the medical records of 674 patients from two oncology hospitals and a specialty hospital in the Ecuadorian mountainous region and one oncology hospital in the coastal region. Among these medical records, 438 did not contain complete information on the variables considered essential for the study and only 229 patients met the inclusion criteria (56 GA from coastal and 99 GA from the mountainous areas, and 25 non-GA from the coastal and 49 non-GA from the mountainous regions), as shown in Table 1.

Since the major goal of the study was the evaluation of HIF-1 expression, the control group was primarily included to observe differences regarding this marker.

As expected, HER2 expression was not observed in the control group.

Considering the stratification of GA patients according the regions, the intestinal Lauren histologic type was more frequent than the diffuse type in both regions. Regarding treatment, surgery alone or combined with chemotherapy/radiotherapy was more frequently performed in the coastal area ( $p = 0.004$ ).

## Expression of HIF-1

The comparisons of GA patients with controls, stratified by region, showed that HIF-1 expression was identified in: I) 37 patients (66.1%) of the coastal region and in 8 controls (32.0%) ( $p = 0.0070$ ), and II) 43 GA patients (43.4%) of the mountainous region and in 47 controls (95.9%) ( $p > 0.001$ ) Table 2.

The statistical analyses referring to the HER2 and HIF-1 expression and the expression patterns of these markers are shown in Table 3 and Figures 1 and 2.

## Survival rate

The overall survival of patients with GA was not influenced by gender, age groups (more or less than 60 years old) and HER2 expression, however, patients from the coastal region and with positive expression of HIF-1 had better survival (Figure 3, Table 4). The survival rate of GA coastal area patients was positively influenced by the age (over 60 years), whereas in mountainous GA patients the survival rate was positively influenced by the female gender and by the expression HIF-1 (Figure 4 and Table 4).

## DISCUSSION

The present study is opportune to verify the relationship between altitude hypoxia and GA, taking advantage of the real circumstances of treatment for patients who reside in the coastal region at 100 meters from sea level and those who reside in the mountainous region at approximately 2,800 meters from sea level.

All patients were followed-up and treated in hospital services belonging to the same institution, the Society for Combating Cancer (SOLCA) of the Ecuador. Of the 155 GA cases evaluated, 64 (41.3%) were women and 91 (58.7%) men, and this male predominance is similar to that observed in epidemiological studies [14]. In addition, the predominance of men was higher in the sample of GA cases attended in the mountain (62.6%), while in the coast it was 51.8%, without reaching significance. These findings may represent a bias in the study design and exclusion criteria, such as loss of follow-up, which is more frequent among men, since in Guayaquil (coastal area) the men/women ratio is 1.7 [5].

**Table 1: Demographic, clinicopathological, and treatment features of Ecuadorian patients exhibiting gastric adenocarcinoma from the coastal or mountainous regions**

| Variable              |                                                 | Costal<br>(n) | Mountain<br>(n) | Total | p value <sup>a</sup> |
|-----------------------|-------------------------------------------------|---------------|-----------------|-------|----------------------|
| Age                   | 60 years                                        | 30 (53.6)     | 51 (51.5)       | 81    | 0.868                |
|                       | >60 years                                       | 26 (46.4)     | 48 (48.5)       | 74    |                      |
| Gender                | Women                                           | 27 (48.2)     | 37 (37.4)       | 64    | 0.235                |
|                       | Men                                             | 29 (51.8)     | 62 (62.6)       | 91    |                      |
| Histology pattern     | Intestinal                                      | 29 (51.8)     | 58 (58.6)       | 87    | 0.011                |
|                       | Diffuse                                         | 22 (39.3)     | 41 (41.4)       | 63    |                      |
|                       | Mixed                                           | 5 (8.9)       | 0 (0.0)         | 5     |                      |
| Tumor stage (n = 155) | IAIB                                            | 4 (7.1)       | 6 (6.1)         | 10    | 0.275                |
|                       | II                                              | 8 (14.3)      | 25 (25.3)       | 33    |                      |
|                       | IIIA                                            | 7 (12.5)      | 15 (15.2)       | 22    |                      |
|                       | IIIB                                            | 13 (23.2)     | 19 (19.2)       | 32    |                      |
|                       | IVM0                                            | 10 (17.9)     | 7 (7.1)         | 17    |                      |
|                       | IVM1                                            | 14 (25.0)     | 27 (27.3)       | 41    |                      |
| Tumor location        | cardia                                          | 3 (5.4)       | 6 (6.1)         | 9     | 1.000                |
|                       | body                                            | 53 (94.6)     | 93 (93.9)       | 146   |                      |
| Treatment             | surgery and/or chemo/<br>radiotherapy           | 56 (32.1)     | 83 (16.2)       | 139   | 0.004                |
|                       | chemotherapy radiotherapy of<br>palliative care | 0 (0.0)       | 16 (1.0)        | 16    |                      |

<sup>a</sup>Fisher's Exact test.

**Table 2: Expression of HIF-1 in gastric adenocarcinoma patients, stratified according to geographical provenance regions; i.e., mountainous or coastal areas, and respective controls**

|                                | Coast              |           |           |                  |                      | Mountainous        |           |           |                  |                      | Coast ×<br>Mountainous |
|--------------------------------|--------------------|-----------|-----------|------------------|----------------------|--------------------|-----------|-----------|------------------|----------------------|------------------------|
|                                | Adeno<br>carcinoma | Control   | Total     | OR (95%CI)       | p value <sup>a</sup> | Adeno<br>carcinoma | Control   | Total     | OR (95%CI)       | p value <sup>a</sup> | p value <sup>b</sup>   |
| <b>Age</b>                     |                    |           |           |                  |                      |                    |           |           |                  |                      |                        |
| ≤ 60 years                     | 30 (53.6)          | 13 (52.0) | <b>43</b> | 0.94 (0.43–2.04) | 1.000                | 51 (51.5)          | 25 (51.0) | <b>76</b> | 0.98 (0.53–1.82) | 1.000                | 0.942                  |
| >60 years                      | 26 (46.4)          | 12 (48.0) | <b>38</b> |                  |                      | 48 (48.5)          | 24 (49.0) | <b>72</b> |                  |                      |                        |
| <b>Gender</b>                  |                    |           |           |                  |                      |                    |           |           |                  |                      |                        |
| Woman                          | 27 (48.2)          | 18 (72.0) | <b>45</b> | 2.76 (1.12–6.67) | 0.056                | 37 (37.4)          | 32 (65.3) | <b>69</b> | 3.15 (1.61–6.25) | 0.002                | 0.834                  |
| Men                            | 29 (51.8)          | 7 (28.0)  | <b>36</b> |                  |                      | 62 (62.6)          | 17 (34.7) | <b>79</b> |                  |                      |                        |
| <b>Expression<br/>of HIF-1</b> |                    |           |           |                  |                      |                    |           |           |                  |                      |                        |
| Negative                       | 19 (33.9)          | 17 (68.0) | <b>36</b> | 4.14 (1.69–10.0) | 0.007                | 56 (56.6)          | 2 (4.1)   | <b>58</b> | 0.03 (0.01–0.10) | <0.001               | <0.001                 |
| Positive                       | 37 (66.1)          | 8 (32.0)  | <b>45</b> |                  |                      | 43 (43.4)          | 47 (95.9) | <b>90</b> |                  |                      |                        |

<sup>a</sup>Fisher's exact test. <sup>b</sup>Homogeneity test (Breslow-Day).

Notwithstanding the gender difference in the coastal region, the GA survival rate was not affected by gender in this area. In contrast, in the mountainous population women had a better survival compared to men. Overall, the increased female survival rate for GA patients is in agreement with previous reports [15].

Patients of the present study exhibited an average age of 60 years in the coastal region and of 59 years in the mountain region. The survival rate for patients with gastric cancer is greater in patients over 60 years [16]. Indeed, in the coastal area of Ecuador the survival rate for GA patients aged over 60 years was greater than those

**Table 3: Demographic features of patients exhibiting gastric adenocarcinoma (GA) and controls individuals, exhibiting gastritis or normal mucosa**

| Variable                                                       |             | GA          | Controls    | Total | OR (95% CI)      | <i>p</i> value <sup>a</sup> |
|----------------------------------------------------------------|-------------|-------------|-------------|-------|------------------|-----------------------------|
| Age                                                            | ≤ 60 years  | 81 (52.3%)  | 38 (51.4%)  | 119   | 0.96 (0.55–1.69) | 1.000                       |
|                                                                | > 60 years  | 74 (47.7%)  | 36 (48.6%)  | 110   |                  |                             |
| Region                                                         | Coastal     | 56 (36.1%)  | 25 (33.8%)  | 81    | 0.90 (0.51–1.59) | 0.769                       |
|                                                                | Mountainous | 99 (63.9%)  | 49 (66.2%)  | 148   |                  |                             |
| Gender                                                         | Woman       | 64 (41.3%)  | 50 (67.6%)  | 114   | 2.97 (1.64–5.26) | <0.001                      |
|                                                                | Men         | 91 (58.7%)  | 24 (32.4%)  | 115   |                  |                             |
| HIF-1 expression (all individuals)                             | Negative    | 75 (48.4%)  | 19 (25.7%)  | 94    | 0.37 (0.20–0.66) | 0.001                       |
|                                                                | Positive    | 80 (51.6%)  | 55 (74.3%)  | 135   |                  |                             |
| HIF-1 expression in GA patients stratified by altitude regions | Coastal     | 37 (66.1%)  | 8 (80.4%)   | 45    | NA               | <0.001                      |
|                                                                | Mountainous | 43 (43.4%)  | 47 (95.9%)  | 90    |                  |                             |
| Expression of HER-2                                            | Negative    | 141 (91.0%) | 74 (100.0%) | 215   | NC               | 0.006                       |
|                                                                | Positive    | 14 (9.0%)   | 0 (0.0%)    | 14    |                  |                             |

<sup>a</sup>Fisher's Exact Test. Abbreviations: NC: Not calculated; ND: Non available data. The statistical analyses (Odds ratio, 95% confidence interval, and *p* values) regarding the comparisons of HIF-1 and HER2 immunohistochemical expression in GA patients (whole group or stratified according to coastal or mountainous regions) with controls are also shown.

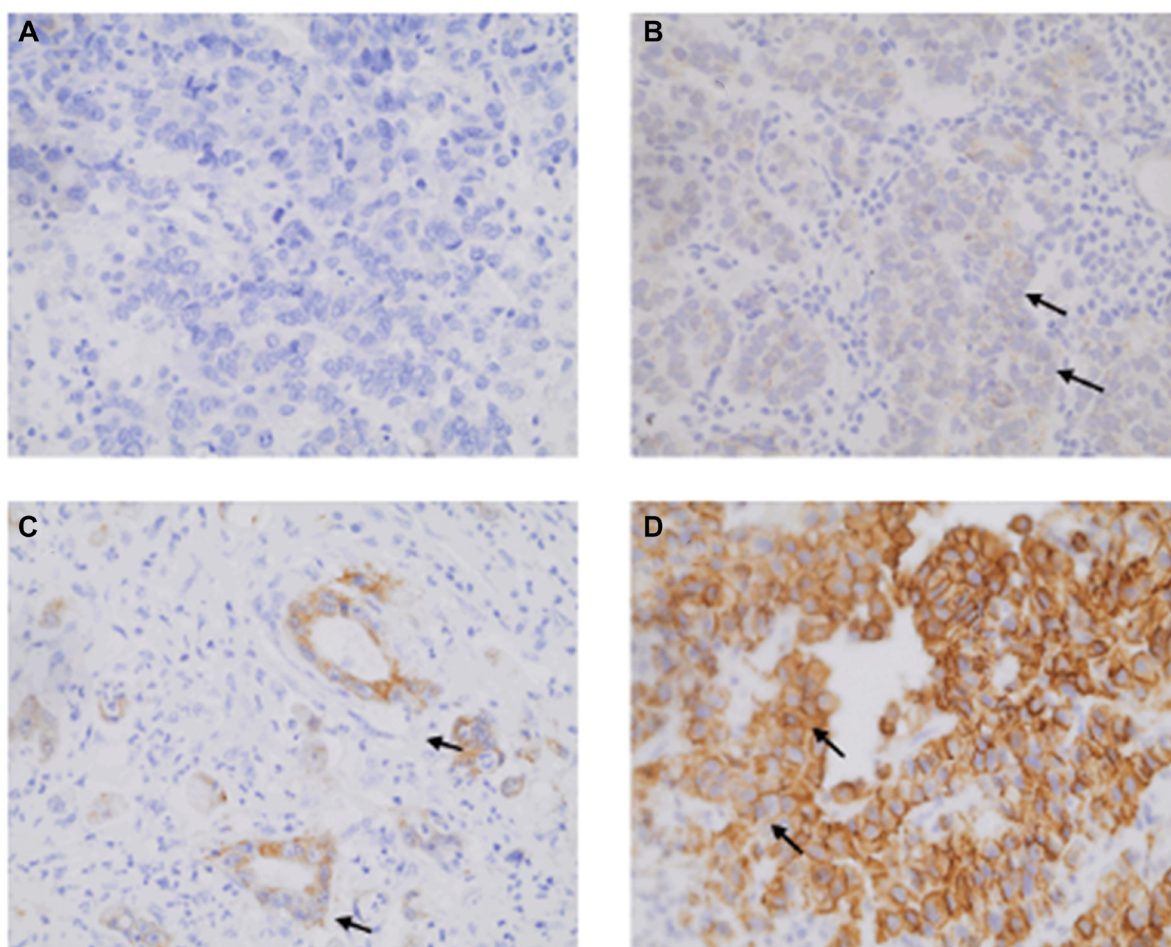

**Figure 1: Illustrative HER2 immunohistochemistry labeling observed for gastric adenocarcinoma (GA) patients at 400× magnification. (A) Lack of labelling (score 0), (B) Weak labelling (arrows; score 1), (C) Weak to moderate staining (score 2), and (D) Strong membrane labelling (arrows; score 3).**

under 60 years. In contrast, in the mountainous region the survival rate for patients under 60 years was greater than that observed for patients over 60 years, indicating the mountainous GA patients may exhibit additional risk factors. It is noteworthy that there is no difference in the GA staging of the cases evaluated between the two regions, but in the coastal area the number of tumor resections was greater than for patients of the mountainous area, and the number of palliative care patients was greater in the mountain region.

In the present study, the HER2 expression in GA patients was only 7% both on the coastal and in the mountainous areas, and was not expressed in patients without adenocarcinoma. HER2 expression has been primarily associated with the intestinal subtype [17], a result that was not observed in the present study.

A recent meta-analysis showed that in 7 out of 15 papers the HER2 positivity was associated with a worse prognosis. In the present study, we observed no significant differences between the survival rate and the HER2 expression in both groups of GA patients, even after adjusting the RMST values for age and gender.

The major focus of the present study was the investigation of the role of HIF-1 in the pathogenesis and

prognosis of GA patients, taking advantage of having access to Ecuadorian oncological services from coastal and mountainous regions, where patients are submitted to differential degrees of chronic hypoxia.

To study the differential HIF-1 expression in gastric samples, we evaluated GA samples from high and low altitudes together with their respective non-GA samples, which served as controls. In short, considering only the non-GA samples, HIF-1 was observed in 32% of the coastal samples and in 95.9% of the mountainous samples. Indeed, we observed the expression of HIF-1 in individuals exhibiting normal biopsies, a finding that differs from other studies, reporting no or low HIF-1 in normal tissue [18, 19]. In contrast to non-GA, HIF-1 was observed in 66.1% of the coastal and in 43.4% of the mountainous GA samples.

Although the control group exhibited gastritis as well as normal mucosa, the overexpression of HIF-1 in mountainous regions compared to the coastal regions indicates that the chronic hypoxia induces the expression of HIF-1, which may be an adaptation of the gastric mucosa to high altitudes, “protecting” the gastric mucosa. Therefore, HIF-1 expression appears to be an early and significant event in normal gastric mucosa or in gastritis,

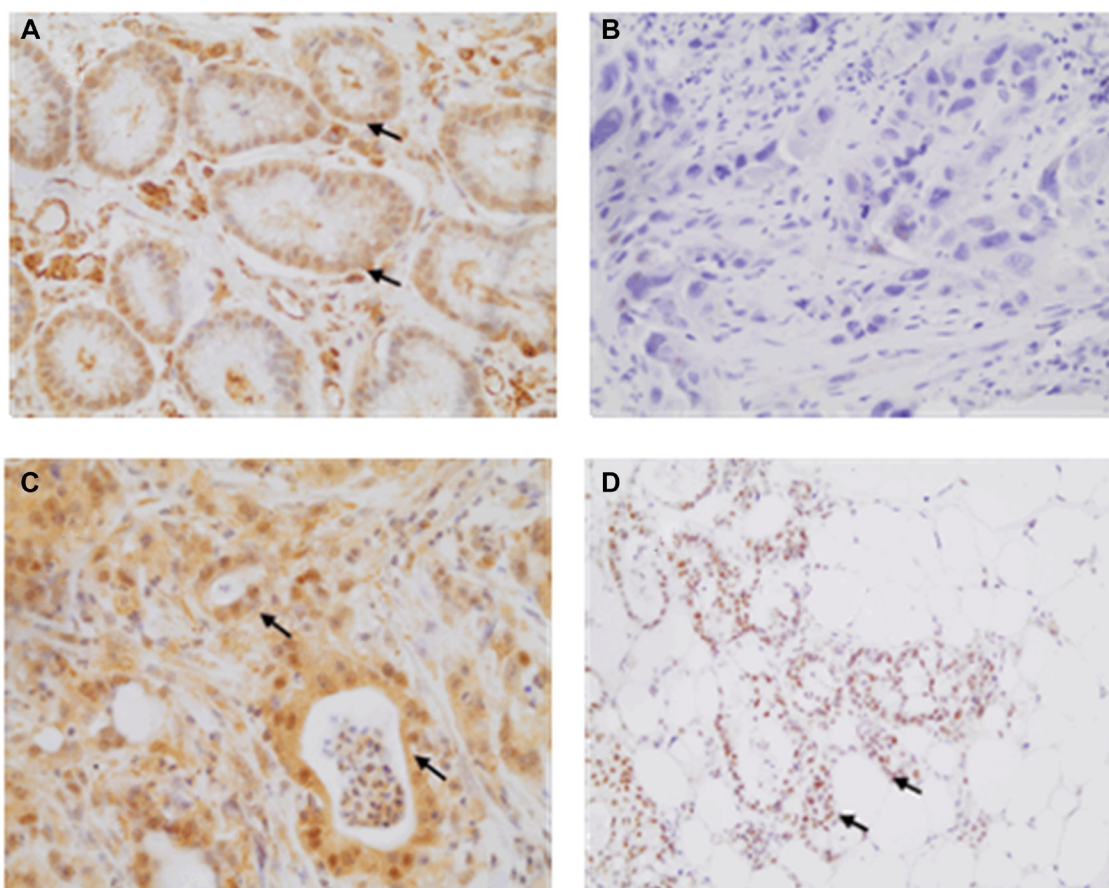

**Figure 2: Illustrative HIF-1 immunohistochemistry labeling observed at 400× magnification for gastric samples. (A)** Gastric mucosa without gastric adenocarcinoma (GA) (score 8), **(B)** Lack of labelling in a GA patient (score 0), **(C)** Moderate expression observed in more than 75% of the nuclei (score 8), and **(D)** Strong labelling observed in more than 75% of the nuclei (score 12).

**Table 4: Survival rate stratified by gender, age, expression of HIF-1 and HER2 in gastric adenocarcinoma patients of mountainous and coast region showing the RMST and  $\Delta$ RMST, (when needed), values at 24, 60, 90 and 120 months**

| Variable               | Coast                    |                          |                                  | Mountainous                    |                                  |                                   |
|------------------------|--------------------------|--------------------------|----------------------------------|--------------------------------|----------------------------------|-----------------------------------|
|                        | RMST (95%CI)<br>24 month | RMST (95%CI)<br>60 month | RMST (95%CI)<br>120 month        | RMST (95%CI)<br>24 month       | RMST (95%CI)<br>60 month         | RMST (95%CI)<br>120 month         |
| <b>Gender</b>          |                          |                          |                                  |                                |                                  |                                   |
| Woman                  | 24.0 (23.9, 24.0)        | 54.3 (49.7, 58.9)        | 96.2 (81.7, 110.7)               | 19.4 (17, 21.8)                | 40.6 (33.1, 48.2)                | 68.6 (52.2, 85)                   |
| Men                    | 22.1 (20.2, 24.0)        | 53.1 (46.8, 59.4)        | 101.7 (87.6, 115.8)              | 17.4 (15.5, 19.4)              | 30.6 (25.0, 36.2)                | 47.7 (35.6, 59.8)                 |
| $\Delta$ RMST          | 1.9 (0, 3.8)             | 1.2 (-6.6, 9.0)          | -5.5 (-25.7, 14.7)               | 2.0 (-1.1, 5.1)                | 10.0 (0.6, 19.4) <sup>#</sup>    | 20.9 (0.5, 41.2) <sup>#</sup>     |
| <b>Age</b>             |                          |                          |                                  |                                |                                  |                                   |
| ≤60 years              | 22.9 (21.8, 24.1)        | 50.5 (44.6, 56.5)        | 90.4 (75.2, 105.6)               | 18.5 (16.4, 20.7)              | 37.3 (30.8, 43.9)                | 49.2 (35.3, 63.1)                 |
| >60 years              | 23.1 (21.4, 24.8)        | 57.7 (53.3, 62.1)        | 110.6 (99.9, 121.2)              | 17.8 (15.6, 20.0)              | 31.3 (24.9, 37.7)                | 61.9 (47.9, 76.0)                 |
| $\Delta$ RMST          | -0.2 (-2.3, 1.9)         | -7.2 (-14.5, 0.2)        | -20.2 (-38.7, -1.6) <sup>#</sup> | 0.7 (-2.3, 3.8)                | 6.0 (-3.1, 15.2)                 | 12.8 (-7.0, 32.5)                 |
| <b>HIF-1</b>           |                          |                          |                                  |                                |                                  |                                   |
| Negative               | 22.8 (20.4, 25.1)        | 56.9 (50.9, 62.8)        | 106.8 (92.5, 121.2)              | 16.8 (14.7, 18.9)              | 28.5 (22.8, 34.2)                | 41.5 (30.1, 53.0)                 |
| Positive               | 23.1 (22.2, 24.1)        | 52.2 (47.2, 57.2)        | 95.6 (82.5, 108.7)               | 20.0 (17.9, 22.1)              | 42.5 (35.6, 49.4)                | 75.1 (59.6, 90.7)                 |
| $\Delta$ RMST          | -0.3 (-2.9, 2.2)         | 4.7 (-3.1, 12.5)         | 11.2 (-8.1, 30.6)                | -3.3 (-6.2, -0.3) <sup>#</sup> | -14.0 (-22.9, -5.0) <sup>#</sup> | -33.6 (-52.9, -14.2) <sup>#</sup> |
| Adj. $\Delta$ RMST (a) | -0.8 (-3.4, 1.7)         | 3.5 (-4.5, 11.6)         | 9.4 (-11.3, 30.3)                | -3.1 (-6.0, -0.1) <sup>#</sup> | -12.7 (-21.6, -3.9) <sup>#</sup> | -20.9 (-41.0, -0.9) <sup>#</sup>  |
| <b>HER2</b>            |                          |                          |                                  |                                |                                  |                                   |
| Negative               | 22.9 (21.7, 24.0)        | 53.6 (49.3, 57.9)        | 99.6 (88.8, 110.4)               | 18.0 (16.4, 19.6)              | 33.9 (29.1, 38.7)                | (b)                               |
| Positive               | 24.0 (24.0, 24.0)        | 55.5 (47.4, 63.6)        | 99.1 (73.8, 124.5)               | 20.4 (16.1, 24.8)              | 41.1 (24.6, 57.6)                | (b)                               |
| $\Delta$ RMST          | -1.1 (-2.3, 0)           | -2.0 (-11.1, 7.2)        | 0.5 (-27.1, 28.0)                | -2.4 (-7.1, 2.2)               | -7.2 (-24.3, 10.0)               | (b)                               |
| Adj. $\Delta$ RMST (a) | (b)                      | -2.7 (-12.1, 6.7)        | -2.9 (-32.1, 26.4)               | -2.4 (-6.7, 1.9)               | -8.5 (-27.3, 10.2)               | (b)                               |

<sup>#</sup>*p* < 0.05, (a)  $\Delta$ RMST adjusted by gender and age, (b) It was not possible to estimate.

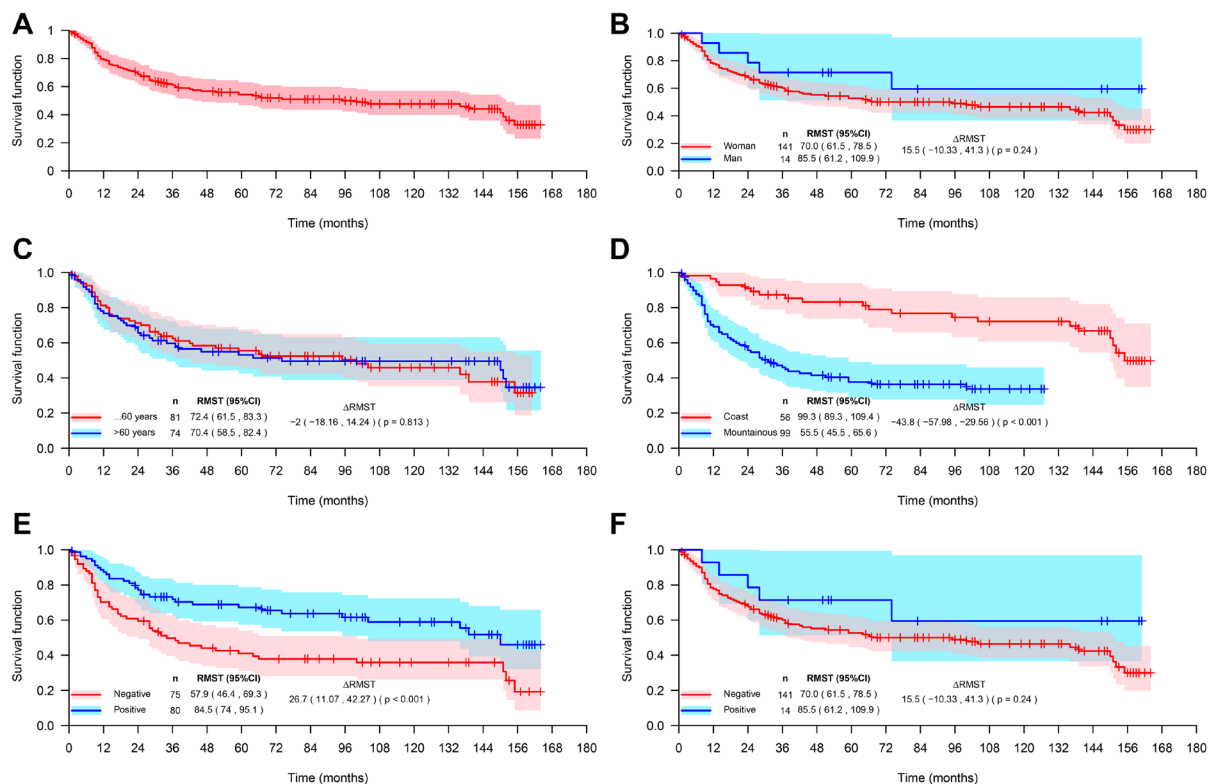

**Figure 3: Overall survival of gastric adenocarcinoma (GA) patients. (A) All studied patients (*n* = 155), and of GA patients stratified by gender (B), age (C), coastal or mountainous regions (D), expression of HIF-1 (E), and expression of HER2 (F).**

without *H. pylori* infection in patients living in the high-altitude regions.

Noteworthy, compared to controls, mountainous GA patients exhibited an under expression of HIF-1, further indicating that the loss of HIF-1 expression may be detrimental for patients living in high altitudes. The finding that GA mountainous patients exhibiting HIF-1 expression presented increased survival rate when

compared to those who did not express HIF-1, even after adjusting the RMST values by gender and age, corroborates this idea.

If, by one hand, hypoxia is a common feature for solid tumors, contributing locally and systemically to tumor progression, lack of response to radiotherapy and chemotherapy, increasing the probability of tumor recurrence [20], on the other hand, the transcription factor

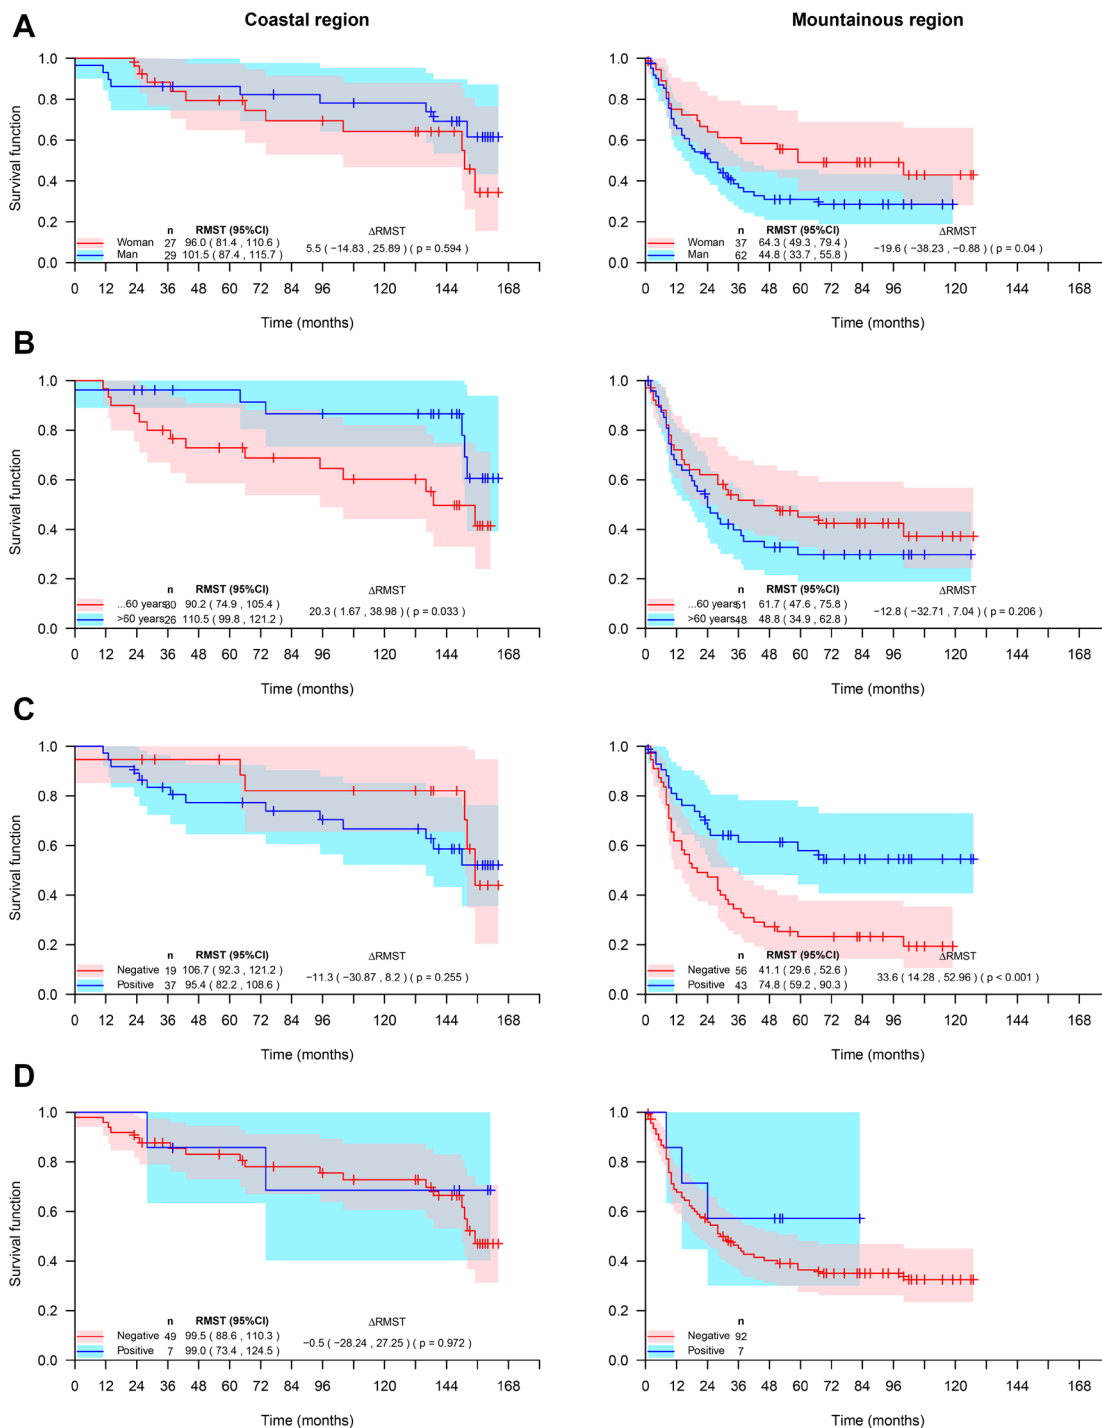

**Figure 4:** Survival rate of Ecuadorian gastric adenocarcinoma patients from coastal or mountainous regions, stratified by gender (A), Age (B), Expression of HIF-1 (C), and expression of HER2 (D).

HIF-1 that is the major regulator of tumor adaptation to hypoxia, may induce the expression of an array of genes with distinct functions [21]. Therefore, the final effect of HIF-1 may depend on the myriad of protein/protein, protein/DNA interactions within the cell nucleus, among other risk factors. In the context of gastric cancer, HIF-1 is one among a large group of risk factors associated with the GA pathogenesis and prognosis.

Concluding, this study suggests that HIF-1 has a differential expression pattern in gastric samples according to geographical features, being highly expressed even in non-carcinomatous cells (gastritis and normal mucosa) from individuals living in regions of high altitude, indicating that the gastric HIF-1 expression may be an adaptation of the individual to high altitudes. Considering that: I) the HIF-1 expression in GA was underrepresented in high altitude areas when compared to controls, and II) the HIF-1 expression in GA samples from high altitudes was associated with better survival rate when compared to samples that do not express HIF-1, irrespective of the age and gender of patients, one may hypothesize that the expression HIF-1 is a protective marker for this population. Finally, studies evaluating the HIF-1 expression should consider altitude as a confusion factor for understanding the role of HIF-1 on GA pathogenesis and prognosis.

## MATERIALS AND METHODS

This is an observational, case-control, cross-sectional, retrospective study. Data were obtained from the electronic medical records of patients diagnosed with GA, and all clinical investigations were carried out in accordance with the principles outlined in the Declaration of Helsinki. The study protocols were approved by the following Ethics Research Committees on Human Beings: I) SOLCA of Quito, II) Central University of Ecuador, III) Hospital of the Unit Oncology of Tungurahua, Ecuador, IV) SOLCA, Guayaquil Hospital, and V) University Hospital of the Ribeirao Preto Medical School, Brazil.

### Study population

We studied 229 individuals, 155 GA cases 99 from the mountainous region of Quito and Ambato and 56 from the Guayaquil coastal region, followed-up in four hospitals from 2005 to 2018. Most of the patients underwent gastrectomy and some of them underwent adjuvant treatment; however, some patients did not accept treatment. No patient underwent neoadjuvant chemotherapy or radiotherapy. Patient inclusion criteria encompassed: I) histopathological diagnosis of GA, II) comprehensive management in one of the SOLCA oncology hospitals (Quito, Ambato, Guayaquil), and III) the availability of blocks of paraffin processed with buffered formaldehyde

for the immunohistochemical studies. Exclusion criteria included: I) patient management or partial management outside SOLCA cancer hospitals, II) patient death in the staging phase or initial treatment, III) patients who were not treated in these cancer centers, and IV) the presence of histologic gastric cancer features other than GA.

In the absence of symptoms, physical examination was performed every 3–6 months during survival time. Follow-up consisted of clinical evaluation, complete blood count, liver function tests, lung, abdominal, and pelvic CT. The date of the first relapse and the date of death were recorded, survival was calculated from the time of histopathological diagnosis, until the last follow-up or death from any cause.

In parallel, we studied 74 patients (49 patients from Quito and Ambato and 25 patients from Guayaquil) without GA, most of them (89%) exhibited gastritis and the remaining exhibited normal mucosa, and none of the controls exhibited *Helicobacter pylori*. Demographic features of the studied individuals are shown in Table 1.

### Histological analyses

GA samples were obtained from endoscopic biopsies or surgical resection, and stained with the hematoxylin and eosin. Tumors were classified according to Lauren, defining the intestinal, diffuse, mixed and indeterminate types. Diffuse carcinomas consisted of loosely cohesive neoplastic cells with little or no glandular formation. Intestinal carcinomas were formed by glands of different degrees of differentiation. Tumors composed of intestinal and diffuse components in equivalent proportions were called mixed. Undifferentiated tumors were classified as indeterminate [14, 15].

### Immunohistochemical analyses for HER2 and HIF1 $\alpha$

The GA samples previously prepared at the SOLCA hospitals were submitted to deparaffinization, diaphanization and hydration. Antigen retrieval was carried out using hot moist, in the Optisteam Plus steam cooker with the high pH buffer (EnVision Kit, Agilent, Santa Clara, CA), for 45 minutes. Endogenous peroxidase was blocked with 3% hydrogen peroxide in PBS pH 7.2 buffer. Slides were incubated for one hour with primary antibodies (rabbit polyclonal antihuman C-erbB-2-oncoprotein, diluted 1:500: DAKO code A-0485, Glostrup, Denmark, and rabbit polyclonal against HIF-1 alpha, dilutes 1:175: Abcam ab82832, Cambridge, UK). After incubation, three consecutive washes with TBST buffer were performed, followed by incubation in the EnVision Flex HRP-Dako detection system (code K8002) for 30 minutes. Then, three consecutive washes were performed using TBST buffer. The reaction was run with diaminobenzidine (DAB) from the EnVision Kit (K8002) in 5 minutes. Positive controls were those recommended by the manufacturer for each



antibody. Negative controls were obtained using the same histological sections used in the positive controls, replacing the primary antibody with diluent.

## Labelling evaluation

All immunohistochemical evaluations were performed by experienced pathologists who were unaware of the study groups.

Criteria for interpreting HER2 immunohistochemical findings in GA included a full membrane, basolateral, or lateral labelling pattern. Samples exhibiting weak/moderate and strong labelling in  $\geq 10\%$  of the cells in at least 5 pooled tumour cells were considered positive (scores 2 and 3). Samples with lack of reactivity or membranous reactivity in  $< 10\%$  of tumour cells (score 0) or weak or barely perceptible membrane reactivity in  $< 10\%$  of tumour cells in surgical specimens and in groups of at least 5 pooled tumour cells (score 1) were considered negative [16, 17] (Table 1).

Criteria for the immunohistochemical analysis of HIF-1 included the evaluation of nuclear staining, as defined by the intensity of the staining and the percentage of positive nuclei. A colour intensity value of 0 was classified as negative; 1 represented a weak staining; 2 as moderate; and 3 as strong staining. The percentage of nuclear positivity was stratified into: 0- negative; 1- positive in  $\leq 10\%$  of cells; 2- positive in  $> 10\%$  and  $\leq 50\%$  of cells; 3- positive in  $> 50\%$  and  $\leq 75\%$  of cells; and 4- positive in  $> 75\%$  of cells. The two scores were multiplied and expressed as: 0 negative; 1–4 weak expression; 5–8, moderate expression; and 9–12, strong expression. The mean score was used as a cut off point for expression (mean score = 6). Finally, samples were classified into the following groups: negative - no expression, low expression (scores 1–6), and high expression (scores 7–12) [18–20]. Table 2 shows these results.

## Statistical analyses

Associations between demographic and clinicopathological features and tumour marker expression were performed using Fisher's exact test. Kaplan-Meier curves were used to analyse overall survival according to classes of variables of interest (gender, age, altitude region, and HIF-1 and HER2 expression). After checking for proportionality of hazards, we verified that standard Cox proportional hazards models and the hazard ratio (HR) measures were inappropriate for our data. Alternatively, restricted median survival time (RMST) was used as a summary statistic for survival curves [22]. The RMST is the median survival time of all subjects followed up to time  $t$ , obtained from the area under the corresponding Kaplan-Meier curve of the survival function up to  $t$ . The RMST was estimated at  $t = 24, 60$  and  $120$  months after treatment or after diagnosis [23]. We considered a RMST

difference, but not a RMST ratio, as the measure of effect because it may be intuitively understandable to clinicians. Comparisons between RMST adjusted for gender and age were made using an adjusted ANCOVA-type analysis, as proposed by Tian [24–26]. RMST values with 95% confidence intervals were estimated using the 'survRM2' package of the R programming language. The significance level adopted was 0.05.

## Abbreviations

GA: gastric adenocarcinoma; GAC: gastric adenocarcinoma coastal; GAM: gastric adenocarcinoma mountainous; HER2: human epidermal receptor 2; HIF: Hypoxia Inducing Factor; SOLCA: Sociedad de Lucha contra el Cáncer; TNM: tumor node metastasis; RMST: restricted median survival time;  $\Delta$ RMST: restricted median survival time difference.

## Author contributions

ECB, EAD, and JSS contributed to study concept and design. ECB, EZM, MOB, AKS, and RK contributed to the analyses and data interpretation. ECB, EAD and JSS drafted the manuscript. All authors read, revised and approved the final manuscript.

## CONFLICTS OF INTEREST

Authors have no conflicts of interest to declare.

## Ethical statement

The study protocols were approved by the following Ethics Research Committees on Human Beings: I) SOLCA of Quito, II) Central University of Ecuador, III) Hospital of the Unit Oncology of Tungurahua, Ecuador, IV) SOLCA, Guayaquil Hospital, and V) University Hospital of the Ribeirao Preto Medical School, Brazil.

## Consent

Data were obtained from the electronic medical records of patients diagnosed with GA, and all clinical investigations were carried out in accordance with the principles outlined in the Declaration of Helsinki.

## FUNDING

Research funded by the Brazilian Research Support Foundations: CAPES (Finance code 01), CNPq (project 302060/2019-7), Fundação Waldemar Barnsley Pessoa and Fundação de Apoio ao Ensino e Pesquisa e Assistência do Hospital das Clínicas da Faculdade de Medicina da Universidade de São Paulo (FAEPA).

## REFERENCES

1. Sociedad de Lucha Contra el Cáncer. Registro Nacional de Tumores. Cueva P, Yépez J. editores. Epidemiología del Cáncer en Quito 2006–2010. Quito. 15 ed. 2014.
2. Rawla P, Barsouk A. Epidemiology of gastric cancer: global trends, risk factors and prevention. *Prz Gastroenterol.* 2019; 14:26–38. <https://doi.org/10.5114/pg.2018.80001>. [PubMed]
3. Cevallos BE. Fundamentos de Oncología. 2006th ed. Cevallos Barrera E, editor. Quito: Imprenta Mena. 2006.
4. NHI. Cancer prevention. 11. 23 of December. 2015. <https://www.cancer.gov/about-cancer/causes-prevention/risk>.
5. Tanca-Campozano, Jhony Real Cotto Ing Leyda Jaramillo Feijoo Dra Rina Quinto Briones J. Cáncer en Guayaquil Registro de tumores solca-guayaquil Sociedad de Lucha Contra el Cáncer del Ecuador-SOLCA Instituto Oncológico Nacional “Dr. Juan Tanca Marengo.” 2015.
6. Gong J, Liu T, Fan Q, Bai L, Bi F, Qin S, Wang J, Xu N, Cheng Y, Bai Y, Liu W, Wang L, Shen L. Optimal regimen of trastuzumab in combination with oxaliplatin/capecitabine in first-line treatment of HER2-positive advanced gastric cancer (CGOG1001): a multicenter, phase II trial. *BMC Cancer.* 2016; 16:68. <https://doi.org/10.1186/s12885-016-2092-9>. [PubMed]
7. Bigham AW, Lee FS. Human high-altitude adaptation: forward genetics meets the HIF pathway. *Genes Dev.* 2014; 28:2189–204. <https://doi.org/10.1101/gad.250167.114>. [PubMed]
8. Burtscher M. Effects of living at higher altitudes on mortality: a narrative review. *Aging Dis.* 2014; 5:274–80. <https://doi.org/10.14336/AD.2014.0500274>. [PubMed]
9. Beall CM. Human adaptability studies at high altitude: research designs and major concepts during fifty years of discovery. *Am J Hum Biol.* 2013; 25:141–47. <https://doi.org/10.1002/ajhb.22355>. [PubMed]
10. Kitajima Y, Miyazaki K. The Critical Impact of HIF-1 $\alpha$  on Gastric Cancer Biology. *Cancers (Basel).* 2013; 5:15–26. <https://doi.org/10.3390/cancers5010015>. [PubMed]
11. Rohwer N, Lobitz S, Daskalow K, Jöns T, Vieth M, Schlag PM, Kemmner W, Wiedenmann B, Cramer T, Höcker M. HIF-1 $\alpha$  determines the metastatic potential of gastric cancer cells. *Br J Cancer.* 2009; 100:772–81. <https://doi.org/10.1038/sj.bjc.6604919>. [PubMed]
12. Garrido DI, Garrido SM. Cancer risk associated with living at high altitude in Ecuadorian population from 2005 to 2014. *Clujul Med.* 2018; 91:188–96. <https://doi.org/10.15386/cjmed-932>. [PubMed]
13. Nakamura J, Kitajima Y, Kai K, Hashiguchi K, Hiraki M, Noshiro H, Miyazaki K. HIF-1 $\alpha$  is an unfavorable determinant of relapse in gastric cancer patients who underwent curative surgery followed by adjuvant 5-FU chemotherapy. *Int J Cancer.* 2010; 127:1158–71. <https://doi.org/10.1002/ijc.25129>. [PubMed]
14. de Martel C, Forman D, Plummer M. Gastric cancer: epidemiology and risk factors. *Gastroenterol Clin North Am.* 2013; 42:219–40. <https://doi.org/10.1016/j.gtc.2013.01.003>. [PubMed]
15. Lauren P. The Two Histological Main Types Of Gastric Carcinoma: Diffuse And So-Called Intestinal-Type Carcinoma. An Attempt At A Histo-Clinical Classification. *Acta Pathol Microbiol Scand.* 1965; 64:31–49. <https://doi.org/10.1111/apm.1965.64.1.31>. [PubMed]
16. Abrahão-Machado LF, Jácome AA, Wohnrath DR, dos Santos JS, Carneseca EC, Fregnani JH, Scapulatempo-Neto C. HER2 in gastric cancer: comparative analysis of three different antibodies using whole-tissue sections and tissue microarrays. *World J Gastroenterol.* 2013; 19:6438–46. <https://doi.org/10.3748/wjg.v19.i38.6438>. [PubMed]
17. De Carli DM, Rocha MP, Antunes LC, Fagundes RB. Immunohistochemical expression of HER2 in adenocarcinoma of the stomach. *Arq Gastroenterol.* 2015; 52:152–55. <https://doi.org/10.1590/S0004-28032015000200015>. [PubMed]
18. Zhong H, De Marzo AM, Laughner E, Lim M, Hilton DA, Zagzag D, Buechler P, Isaacs WB, Semenza GL, Simons JW. Overexpression of hypoxia-inducible factor 1 $\alpha$  in common human cancers and their metastases. *Cancer Res.* 1999; 59:5830–35. [PubMed]
19. Griffiths EA, Pritchard SA, Valentine HR, Whitcelo N, Bishop PW, Ebert MP, Price PM, Welch IM, West CM. Hypoxia-inducible factor-1 $\alpha$  expression in the gastric carcinogenesis sequence and its prognostic role in gastric and gastro-oesophageal adenocarcinomas. *Br J Cancer.* 2007; 96:95–103. <https://doi.org/10.1038/sj.bjc.6603524>. [PubMed]
20. Aquino-Gálvez A, González-Ávila G. El papel del factor inducible por hipoxia 1 (HIF-1) en la fibrosis pulmonar idiopática. *Revisión Neumol Cir Torax.* 2010; 69:170–77. <http://www.medigraphic.org.mx>.
21. Soni S, Padwad YS. HIF-1 in cancer therapy: two decade long story of a transcription factor. *Acta Oncol.* 2017; 56:503–15. <https://doi.org/10.1080/0284186X.2017.1301680>. [PubMed]
22. Zhao L, Claggett B, Tian L, Uno H, Pfeffer MA, Solomon SD, Trippa L, Wei LJ. On the restricted mean survival time curve in survival analysis. *Biometrics.* 2016; 72:215–21. <https://doi.org/10.1111/biom.12384>. [PubMed]
23. Kang KH, Okoye CC, Patel RB, Siva S, Biswas T, Ellis RJ, Yao M, Machtay M, Lo SS. Complications from Stereotactic Body Radiotherapy for Lung Cancer. *Cancers (Basel).* 2015; 7:981–1004. <https://doi.org/10.3390/cancers7020820>. [PubMed]
24. Kang YK, Morita S, Satoh T, Ryu MH, Chao Y, Kato K, Chung HC, Chen JS, Muro K, Kang WK, Yeh KH, Yoshikawa T, Oh SC, et al. Exploration of predictors of benefit from nivolumab monotherapy for patients with pretreated advanced gastric and gastroesophageal junction cancer: post hoc subanalysis from the ATTRACTION-2 study. *Gastric Cancer.* 2022; 25:207–17. <https://doi.org/10.1007/s10120-021-01230-4>. [PubMed]

25. Tian L, Zhao L, Wei LJ. Predicting the restricted mean event time with the subject's baseline covariates in survival analysis. *Biostatistics*. 2014; 15:222–33. <https://doi.org/10.1093/biostatistics/kxt050>. [PubMed]
26. Nogueira MC, Guerra MR, Cintra JRD, Corrêa CSL, Fayer VA, Bustamante-Teixeira MT. Disparidade racial na sobrevivência em 10 anos para o câncer de mama:

uma análise de mediação usando abordagem de respostas potenciais [Racial disparity in 10-year breast cancer survival: a mediation analysis using potential responses approach]. *Cad Saude Publica*. 2018; 34:e00211717. <https://doi.org/10.1590/0102-311X00211717>. [PubMed]
